# Supplementary material for: Whole-exome sequencing identifies somatic mutations and intratumor heterogeneity in inflammatory breast cancer
Source: PubMed Central journal article supplement (PMC8169683; doi:10.1038/s41523-021-00278-w), 2021-06-01
Supplement: 41523_2021_278_MOESM1_ESM.pdf [file 41523_2021_278_MOESM1_ESM.pdf]

## **Supplementary information**

**Supplementary Figure 1.** Plots of allele frequency over sequencing depth for mutations identified in tumor and matched normal samples.

**Supplementary Figure 2.** The distribution of somatic mutations types for each patient.

**Supplementary Figure 3.** Subclonal architecture for patient P6.

**Supplementary Table 1.** Clinical and pathological information of the six IBC patients

**Supplementary Table 2.** Details of the tumor and normal tissue samples in the six IBC patients

**Supplementary Table 3.** QPLOT results, including mean depth, insert size and mapping rate

**Supplementary Data 1.** List of all mutations identified in patients P1-P6

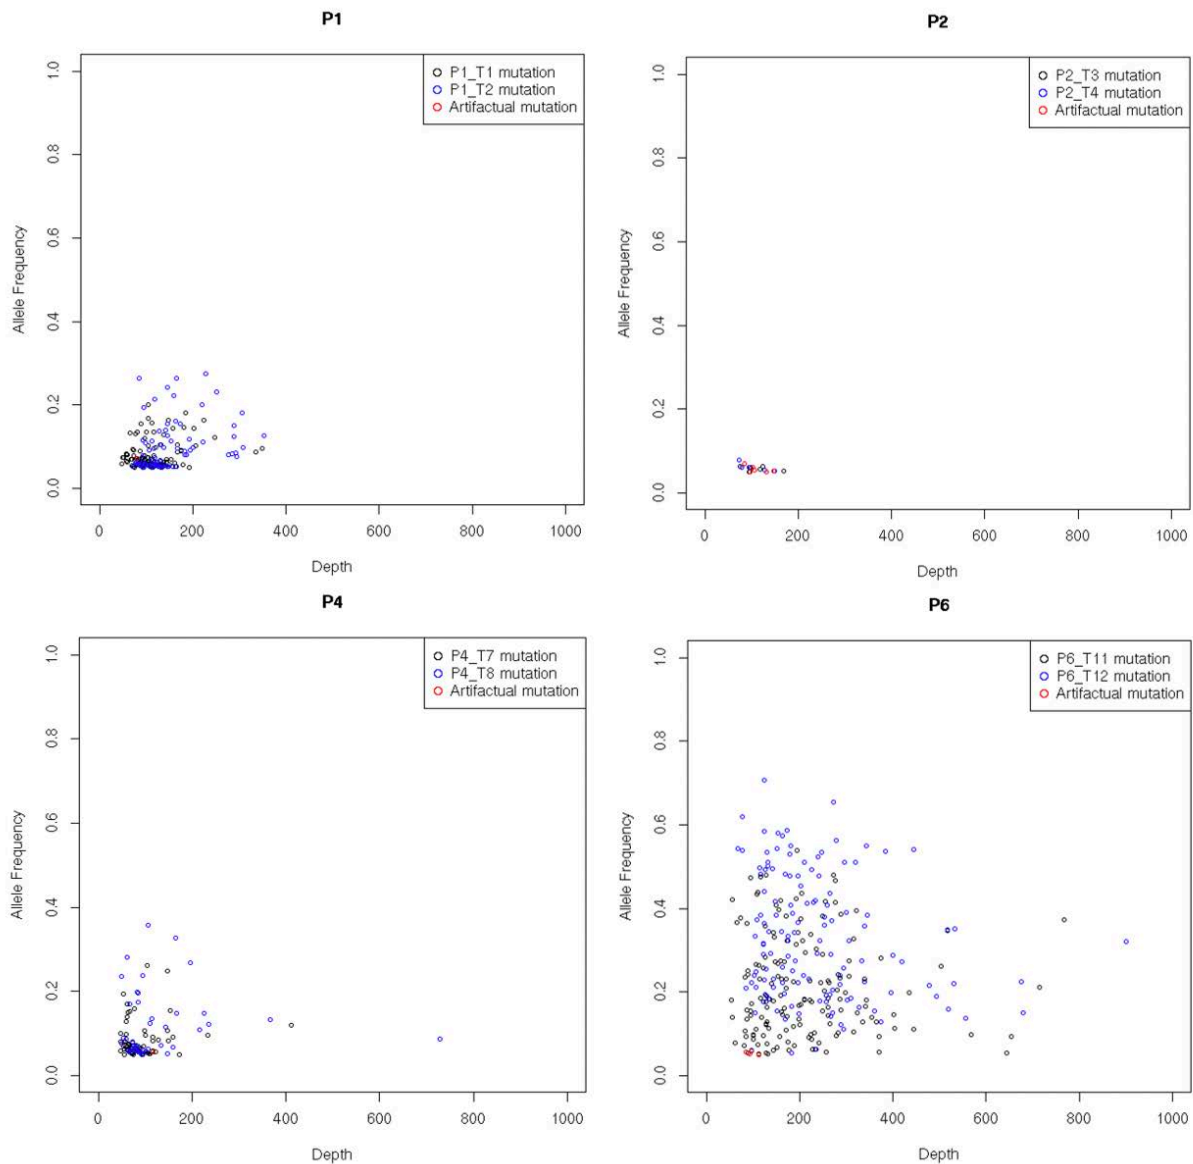

**Supplementary Figure 1.** Plots of allele frequency over sequencing depth for mutations identified in tumor and matched normal samples.

Four patients had matched normal samples (P1, P2, P4 and P6). We obtained two tumor samples from each patient, with mutations identified from the two samples represented as black or blue circles respectively. Patient 6 has many mutations, including several detected at moderate depths with high allele frequencies, which are indicative of driver mutations. Artifactual mutation calls are represented in red, as explained in the methods.

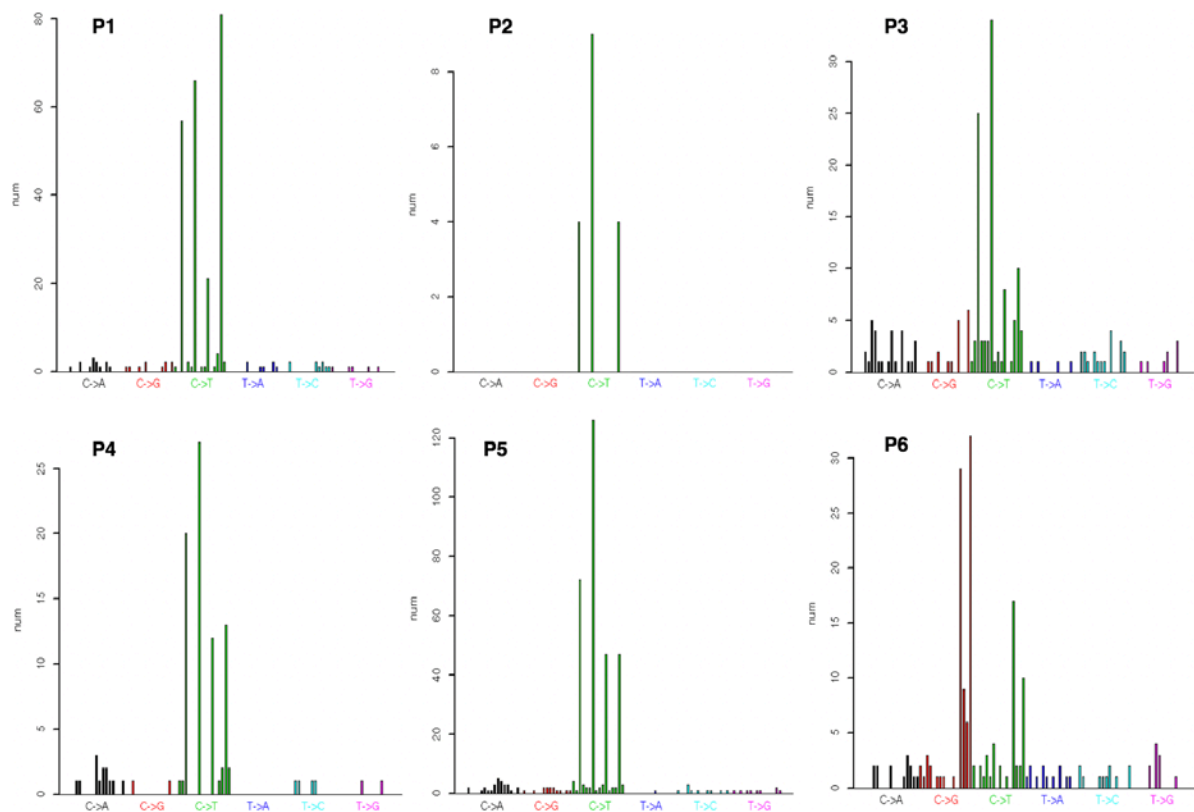

**Supplementary Figure 2.** The distribution of somatic mutations types for each patient. There are six classes of base substitutions, including C->A (black), C->G (red), C->T (green), T->A (blue), T->C (cyan), T->G (pink) (all substitutions are referred to by the pyrimidine of the mutated Watson-Crick base pair). Incorporating information on the bases immediately 5' and 3' to each mutated base results in 96 possible mutations types in this classification, represented in the x-axis. The number of each type of somatic mutation is represented by the y-axis. All patients show predominantly C > T transitions, similar to previous findings in somatic breast cancer mutations. Patient P6 shows both C > T and C > G transitions.

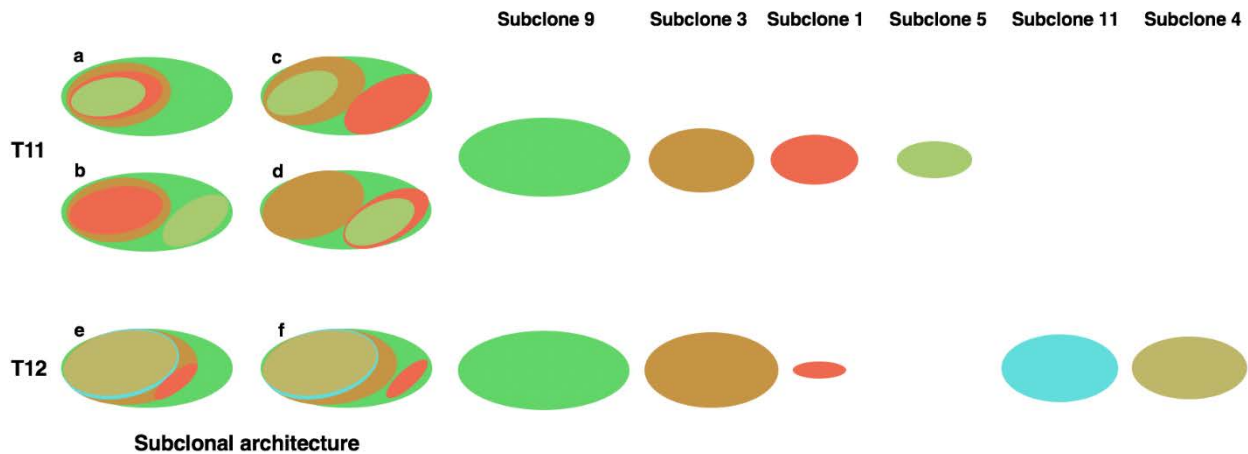

**Supplementary Figure 3.** Subclonal architecture for patient P6.

There are four different possible subclonal architectures for sample T11 (a, b, c and d) and two for sample T12 (e and f). If the subclonal architecture for T11 is a or b, then the corresponding subclonal architecture for T12 should be e, according to the deduced linear and/or branching relationships of these subclones. Similarly, if the subclonal architecture for T11 is c or d, then the corresponding subclonal architecture for T12 should be f. The area of the ovals is proportional to the estimated cluster CCF. Subclones are labelled in the same color as in Figure 3b. Subclone 9, 3 and 1 are shared by both samples in P6.

**Supplementary Table 1.** Clinical and pathological information of the six IBC patients

| <b>Patients</b> | <b>Race</b> | <b>Age</b> | <b>Sex</b> | <b>Sampling Date</b> | <b>TNM Stage</b> | <b>Grade</b>                 | <b>ER Positivity</b> | <b>PR Positivity</b> | <b>HER2 Status</b> |
|-----------------|-------------|------------|------------|----------------------|------------------|------------------------------|----------------------|----------------------|--------------------|
| <b>P1</b>       | black       | 36         | F          | 1993                 | T2, N1, M0       | N/A                          | 5%                   | 80%                  | N/A                |
| <b>P2</b>       | N/A         | 52         | F          | 1996                 | T4b, N1, M0      | Nuclear 2-3<br>/Histologic 3 | 95%                  | 40%                  | Score 3+           |
| <b>P3</b>       | white       | 62         | F          | 1998                 | T3, N1b, M0      | Nuclear 2<br>/Histologic 3   | 85%                  | 25%                  | Score 0            |
| <b>P4</b>       | white       | 59         | F          | 1999                 | T4b, N2, M0      | Nuclear 2-3<br>/Histologic 3 | 80%                  | <2%                  | Score 2+           |
| <b>P5</b>       | white       | 72         | F          | 2004                 | T2, N0, M0       | N/A                          | >90%                 | >90%                 | Score 2+           |
| <b>P6</b>       | black       | 54         | F          | 2012                 | T4d, N0, M1      | Nuclear 3<br>/Histologic 3   | 95%                  | 95%                  | Score 0            |

Note: *IBC* inflammatory breast cancer; *ER* estrogen receptor; *PR* progesterone receptor; *HER2* human epidermal growth factor receptor 2; *N/A* not available. The TNM staging system developed by the American Joint Committee on Cancer (AJCC) classifies cancers by the size and extent of the primary tumor (T), involvement of regional lymph nodes (N), and the presence or absence of distant metastases (M). Reporting results of HER2 testing by immunohistochemistry (IHC): Negative (Score 0); Negative (Score 1+); Equivocal (Score 2+); Positive (Score 3+).

**Supplementary Table 2.** Details of the tumor and normal tissue samples in the six IBC patients

| Patients  | Sample ID | Sample Type | Tissue Location                                        | Sample Source     | Somatic Mutations |
|-----------|-----------|-------------|--------------------------------------------------------|-------------------|-------------------|
| <b>P1</b> | P1_N1     | Normal      | Upper outer quadrant of breast                         | Mastectomy        | 0                 |
|           | P1_T1     | Tumor       | Areola                                                 |                   | 199               |
|           | P1_T2     | Tumor       | Tumor                                                  |                   | 94                |
| <b>P2</b> | P2_N2     | Normal      | Not available                                          | Incisional biopsy | 0                 |
|           | P2_T3     | Tumor       | Tumor                                                  |                   | 9                 |
|           | P2_T4     | Tumor       | Remainder of breast                                    |                   | 6                 |
| <b>P3</b> | P3_T5     | Tumor       | Tumor                                                  | Lumpectomy        | 142               |
|           | P3_T6     | Tumor       | Nipple                                                 |                   | 119               |
| <b>P4</b> | P4_N3     | Normal      | Nipple                                                 | Mastectomy        | 0                 |
|           | P4_T7     | Tumor       | Skin (tumor infiltration)                              |                   | 73                |
|           | P4_T8     | Tumor       | Tumor                                                  |                   | 47                |
| <b>P5</b> | P5_T9     | Tumor       | Nipple in relation to tumor                            | Lumpectomy        | 233               |
|           | P5_T10    | Tumor       | Retroareolar tumor                                     |                   | 262               |
| <b>P6</b> | P6_N4     | Normal      | Lower inner quadrant of breast, part from T11's normal | Mastectomy        | 0                 |
|           | P6_T11    | Tumor       | Tumor to nipple                                        |                   | 161               |
|           | P6_T12    | Tumor       | Tumor                                                  |                   | 132               |

Note: *IBC* inflammatory breast cancer

**Supplementary Table 3.** QPLOT results, including mean depth, insert size and mapping rate

| Patients | Sample ID | Mean depth | Insert size mode | Insert size median | Mapping rate (%) | Map quality <10 (%) | Proper paired (%) | Mapped bases (e9) | Total reads (e6) | Q20 bases (e9) | Duplication rate (%) |
|----------|-----------|------------|------------------|--------------------|------------------|---------------------|-------------------|-------------------|------------------|----------------|----------------------|
| P1       | P1_N1     | 160.33     | 98               | 104                | 99.64            | 10.31               | 93.8              | 7.55              | 191.57           | 7.33           | 21.35                |
|          | P1_T1     | 174.3      | 109              | 118                | 99.48            | 9.39                | 91.29             | 8.21              | 194.28           | 7.93           | 13.89                |
|          | P1_T2     | 152.39     | 114              | 124                | 99.82            | 8.27                | 95.89             | 7.17              | 158.46           | 7.01           | 13.76                |
| P2       | P2_N2     | 162.53     | 118              | 127                | 99.24            | 9.75                | 89.07             | 7.65              | 186.98           | 7.34           | 12.26                |
|          | P2_T3     | 170.96     | 107              | 115                | 99.44            | 10.86               | 87.16             | 8.05              | 203.94           | 7.83           | 13.37                |
|          | P2_T4     | 161.66     | 112              | 121                | 99.32            | 9.53                | 91.07             | 7.61              | 193.65           | 7.39           | 16.99                |
| P3       | P3_T5     | 166.2      | 110              | 119                | 99.45            | 10.41               | 88.88             | 7.83              | 185.14           | 7.64           | 12.29                |
|          | P3_T6     | 142.06     | 115              | 123                | 99.26            | 11.15               | 90.22             | 6.69              | 160.29           | 6.39           | 10.6                 |
| P4       | P4_N3     | 183.41     | 100              | 105                | 99.44            | 11.02               | 90.01             | 8.64              | 233.18           | 8.4            | 21.56                |
|          | P4_T7     | 133.33     | 91               | 94                 | 99.38            | 10.44               | 94.06             | 6.27              | 173.97           | 6.12           | 25.87                |
|          | P4_T8     | 155.34     | 100              | 104                | 99.55            | 10.48               | 90.19             | 7.31              | 190.73           | 7.11           | 19.39                |
| P5       | P5_T9     | 209.93     | 106              | 115                | 99.49            | 6.93                | 94.94             | 9.88              | 210.2            | 9.57           | 13.32                |
|          | P5_T10    | 198.05     | 106              | 115                | 99.31            | 6.75                | 94.6              | 9.32              | 200.39           | 9.03           | 13.88                |
| P6       | P6_N4     | 176.33     | 129              | 141                | 99.9             | 6.78                | 97.3              | 8.29              | 177              | 8.12           | 11.38                |
|          | P6_T11    | 191.81     | 132              | 141                | 99.58            | 6.83                | 93.26             | 9.03              | 193.26           | 8.76           | 8.69                 |
|          | P6_T12    | 187.01     | 116              | 132                | 99.3             | 6.48                | 97.1              | 8.8               | 193.84           | 8.41           | 13.11                |
